# Supplementary material for: Impact of Soil Temperature on Prizm Zoysiagrass Establishment from Sprigs
Source: MDPI journal article supplement (doi:10.3390/agronomy12102329), 2022-09-27
Supplement: s1 [file s1]

# SUPPLEMENTARY MATERIALS

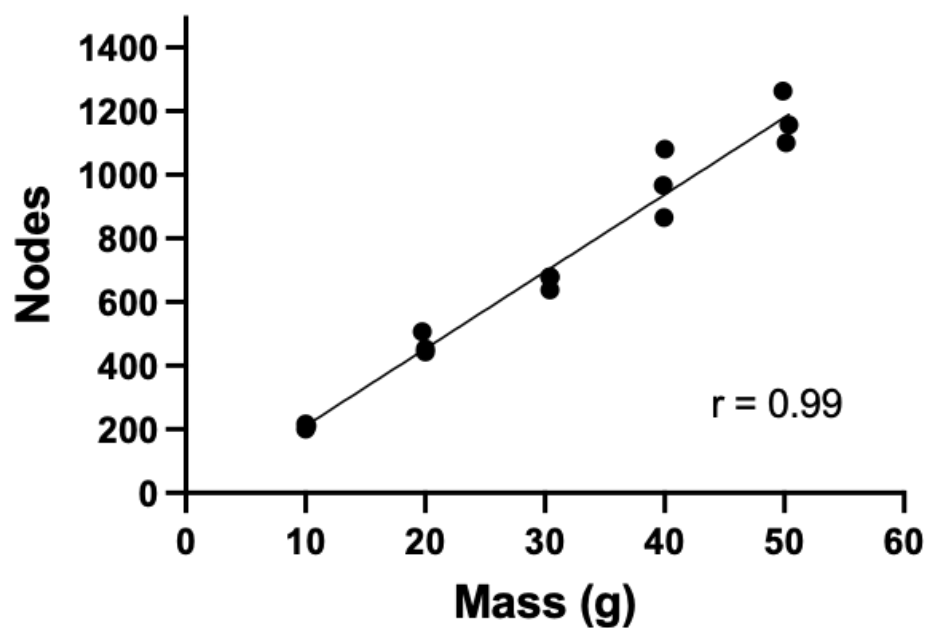

**Figure S1.** Correlation between increasing sprig material mass and increasing sprig node number. The number of 'Prizm' zoysiagrass [*Zoysia matrella* (L.) Merr.] nodes were determined for sprigs weighing 10, 20, 30, 40, and 50 g in Knoxville, TN in 2022.
