# Supplementary material for: Impact of Soil Temperature on Prizm Zoysiagrass Establishment from Sprigs
Source: MDPI journal article supplement (doi:10.3390/agronomy12102329), 2022-09-27
Supplement: s1 [file s1]

Archive with 1 entries (1 files):
- agronomy-1910657-supplementary.pdf
